# Supplementary material for: Spatial resolution comparison of AC-SECM with SECM and their characterization of self-healing performance of hexamethylene diisocyanate trimer microcapsule coatings
Source: Royal Society of Chemistry journal article supplement (doi:10.1039/c5ta00529a), 2015-01-01
Supplement: c5ta00529a1.pdf [file c5ta00529a1.pdf]

Electronic Supporting Information

## **Spatial resolution comparison of AC-SECM with SECM and their characterizations of self-healing performance of hexamethylene diisocyanate trimer microcapsule coatings**

*Wei Wang<sup>\*a, b</sup>, Likun Xu<sup>a</sup>, Huyuan Sun<sup>b</sup>, Xiangbo Li<sup>a</sup>, Shouhuan Zhao<sup>c</sup>, and Weining Zhang<sup>d</sup>*

a. State Key Laboratory for Marine Corrosion and Protection, Luoyang Ship Material Research Institute (LSMRI). 149-1 Zhuzhou Road, Laoshan District, Qingdao, 266101, PR China.

b. Key Laboratory of Marine Environmental Corrosion and Bio-fouling, Institute of Oceanology, Chinese Academy of Sciences. 7 Nanhai Road, Qingdao, 266071, PR China.

c. Food Science and Technology College, Shanghai Ocean University, 999 Huchenghuan Road, Shanghai, 201306, PR China.

d. Beijing Yinglong Technology Co., Ltd, 13-414 Rongfeng, XuanWu District, Beijing, 100073, PR China.

\*Corresponding author: Tel.: +86 532 68725174; Fax: +86 532 68725001;

E-mail:wwei020404@126.com

## S1 AC-SECM images

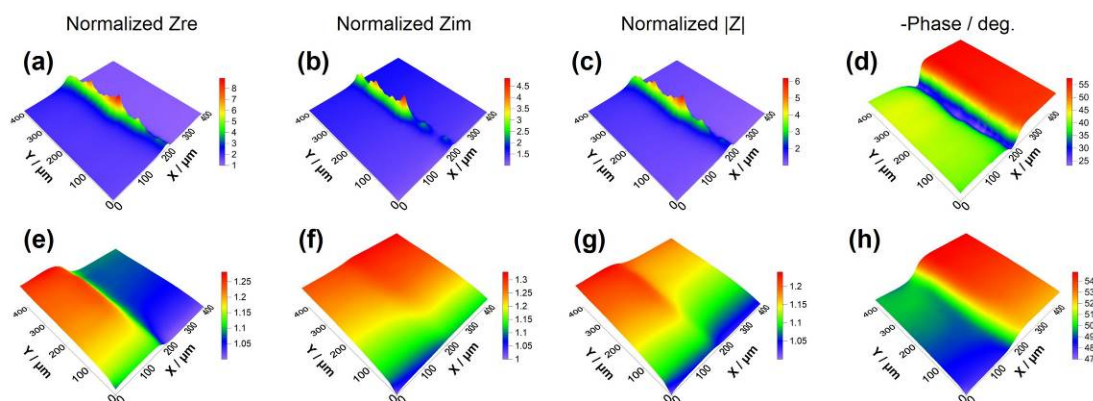

**Fig. S1** AC-SECM images of a self-healing coated surface immersed in a solution of 0.6 M NaCl. DC potential: 0 V. Amplitude of the AC potential signal: 10 mV, and frequency of 37301 Hz. Tip diameter: 25  $\mu\text{m}$ ; tip-substrate distance: 15  $\mu\text{m}$ . (a-d) sample with scratch. (e-h) healed sample. Scanning step of the UME tip was 12.5  $\mu\text{m}$ .

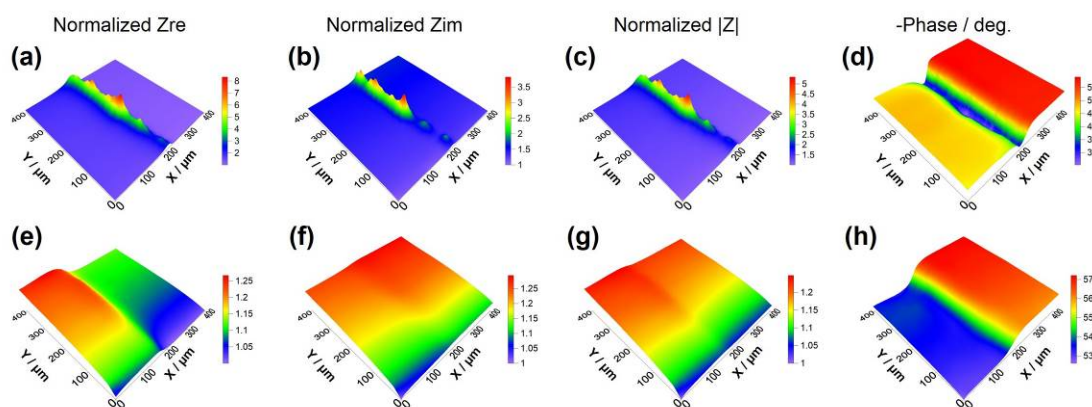

**Fig. S2** AC-SECM images of a self-healing coated surface immersed in a solution of 0.6 M NaCl. DC potential: 0 V. Amplitude of the AC potential signal: 10 mV, and frequency of 23190 Hz. Tip diameter: 25  $\mu\text{m}$ ; tip-substrate distance: 15  $\mu\text{m}$ . (a-d) sample with scratch. (e-h) healed sample. Scanning step of the UME tip was 12.5  $\mu\text{m}$ .

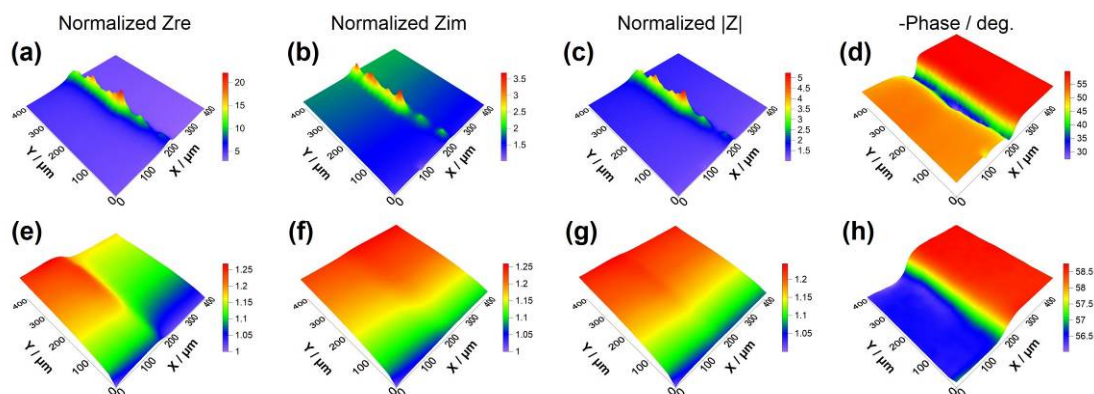

**Fig. S3** AC-SECM images of a self-healing coated surface immersed in a solution of 0.6 M NaCl. DC potential: 0 V. Amplitude of the AC potential signal: 10 mV, and frequency of 14417 Hz. Tip diameter: 25  $\mu\text{m}$ ; tip-substrate distance: 15  $\mu\text{m}$ . (a-d) sample with scratch. (e-h) healed sample. Scanning step of the UME tip was 12.5  $\mu\text{m}$ .

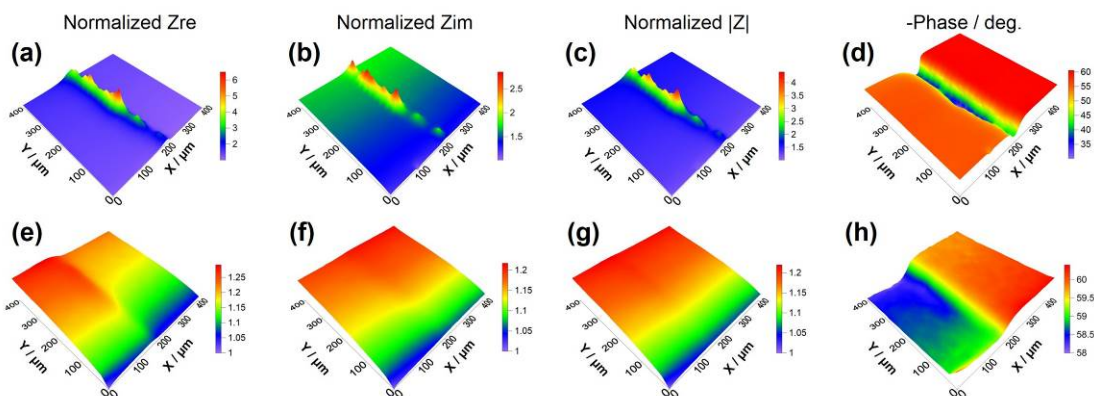

**Fig. S4** AC-SECM images of a self-healing coated surface immersed in a solution of 0.6 M NaCl. DC potential: 0 V. Amplitude of the AC potential signal: 10 mV, and frequency of 8963 Hz. Tip diameter: 25  $\mu\text{m}$ ; tip-substrate distance: 15  $\mu\text{m}$ . (a-d) sample with scratch. (e-h) healed sample. Scanning step of the UME tip was 12.5  $\mu\text{m}$ .

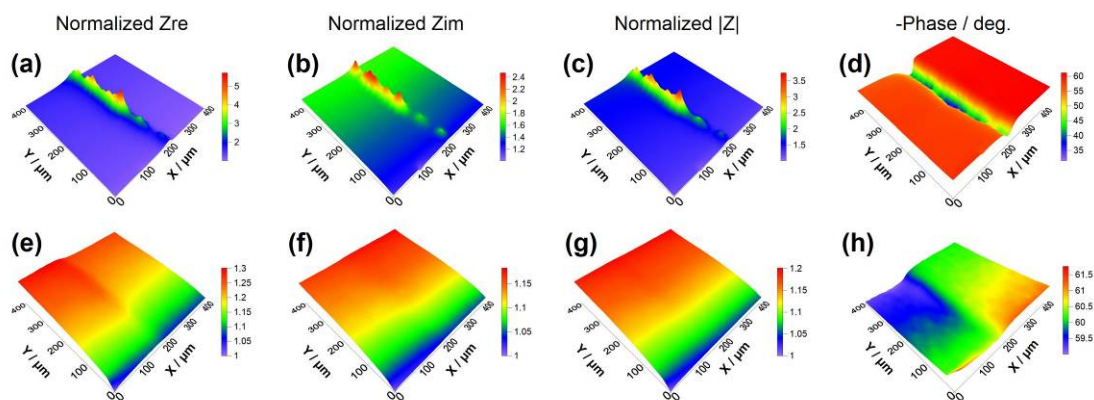

**Fig. S5** AC-SECM images of a self-healing coated surface immersed in a solution of 0.6 M NaCl. DC potential: 0 V. Amplitude of the AC potential signal: 10 mV, and frequency of 5572 Hz. Tip diameter: 25  $\mu\text{m}$ ; tip-substrate distance: 15  $\mu\text{m}$ . (a-d) sample with scratch. (e-h) healed sample. Scanning step of the UME tip was 12.5  $\mu\text{m}$ .

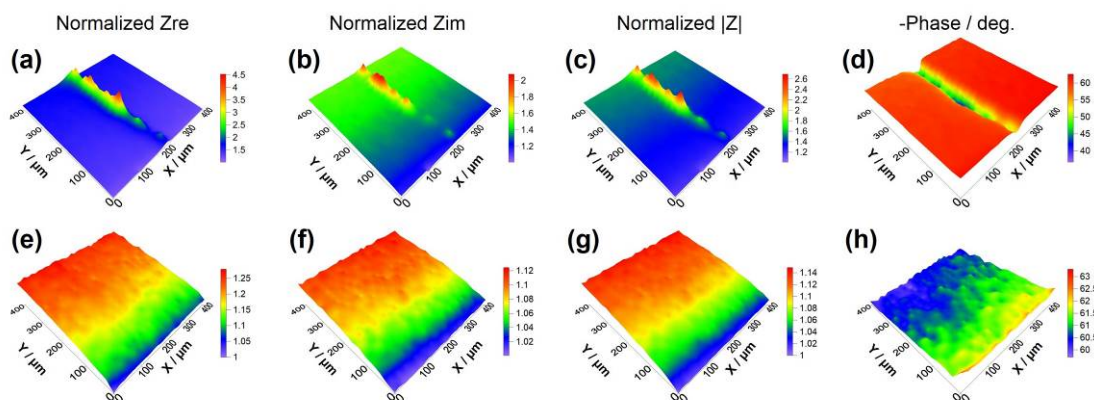

**Fig. S6** AC-SECM images of a self-healing coated surface immersed in a solution of 0.6 M NaCl. DC potential: 0 V. Amplitude of the AC potential signal: 10 mV, and frequency of 2154 Hz. Tip diameter: 25  $\mu\text{m}$ ; tip-substrate distance: 15  $\mu\text{m}$ . (a-d) sample with scratch. (e-h) healed sample. Scanning step of the UME tip was 12.5  $\mu\text{m}$ .

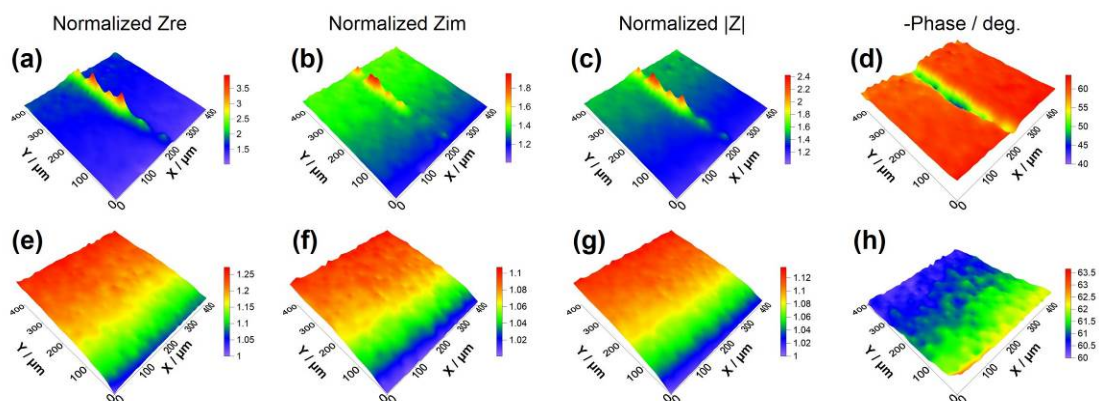

**Fig. S7** AC-SECM images of a self-healing coated surface immersed in a solution of 0.6 M NaCl. DC potential: 0 V. Amplitude of the AC potential signal: 10 mV, and frequency of 1339 Hz. Tip diameter: 25  $\mu\text{m}$ ; tip-substrate distance: 15  $\mu\text{m}$ . (a-d) sample with scratch. (e-h) healed sample. Scanning step of the UME tip was 12.5  $\mu\text{m}$ .

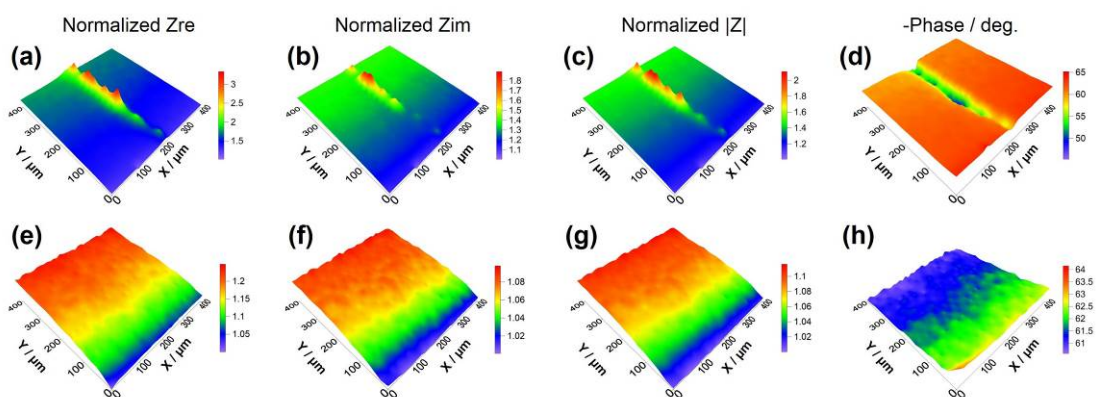

**Fig. S8** AC-SECM images of a self-healing coated surface immersed in a solution of 0.6 M NaCl. DC potential: 0 V. Amplitude of the AC potential signal: 10 mV, and frequency of 832 Hz. Tip diameter: 25  $\mu\text{m}$ ; tip-substrate distance: 15  $\mu\text{m}$ . (a-d) sample with scratch. (e-h) healed sample. Scanning step of the UME tip was 12.5  $\mu\text{m}$ .



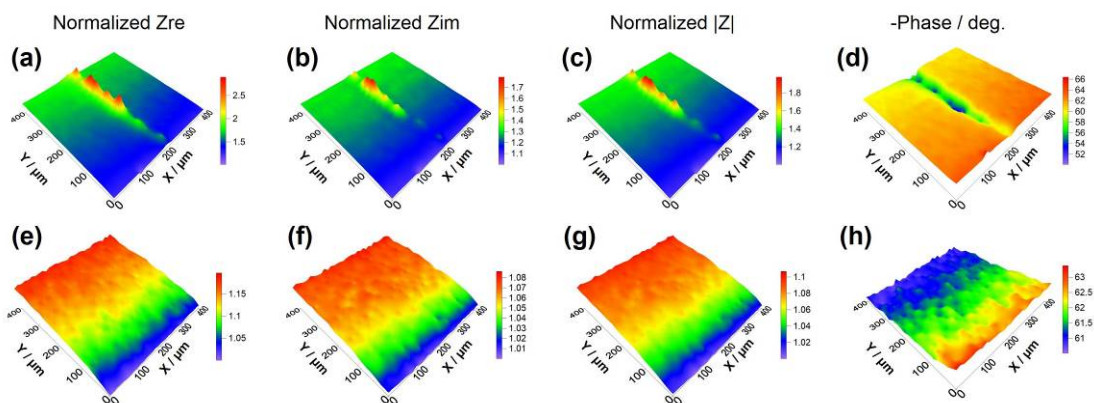

**Fig. S9** AC-SECM images of a self-healing coated surface immersed in a solution of 0.6 M NaCl. DC potential: 0 V. Amplitude of the AC potential signal: 10 mV, and frequency of 517 Hz. Tip diameter: 25  $\mu\text{m}$ ; tip-substrate distance: 15  $\mu\text{m}$ . (a-d) sample with scratch. (e-h) healed sample. Scanning step of the UME tip was 12.5  $\mu\text{m}$ .

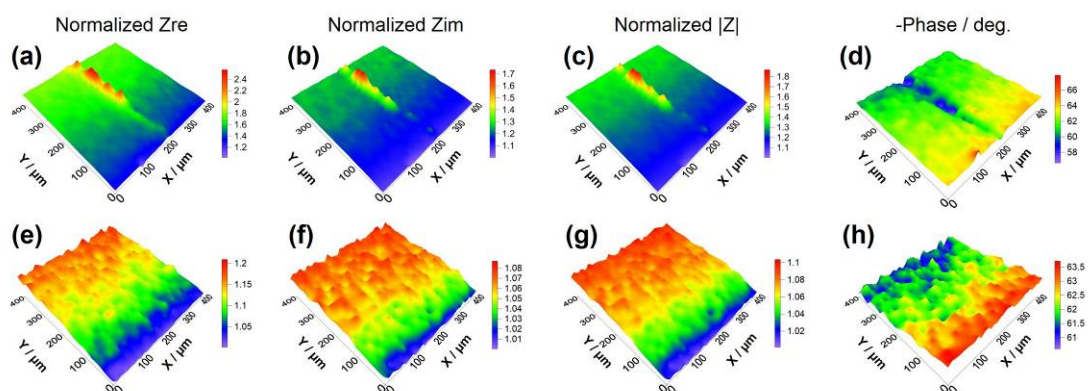

**Fig. S10** AC-SECM images of a self-healing coated surface immersed in a solution of 0.6 M NaCl. DC potential: 0 V. Amplitude of the AC potential signal: 10 mV, and frequency of 312 Hz. Tip diameter: 25  $\mu\text{m}$ ; tip-substrate distance: 15  $\mu\text{m}$ . (a-d) sample with scratch. (e-h) healed sample. Scanning step of the UME tip was 12.5  $\mu\text{m}$ .
